# Supplementary material for: Oncogenic miR-210-3p promotes prostate cancer cell EMT and bone metastasis via NF-κB signaling pathway
Source: PubMed Central journal article supplement (PMC5504657; doi:10.1186/s12943-017-0688-6), 2017-07-10
Supplement: 12943_2017_688_MOESM1_ESM.pdf [file 12943_2017_688_MOESM1_ESM.pdf]

**Table S1. A list of primers used in the reactions for clone PCR.**

| <b>Used for subcloning and plasmid construction:</b> |                        |
|------------------------------------------------------|------------------------|
| miR-210-3p-clone-F                                   | GGGACCAGGTCATTTGCATACG |
| miR-210-3p-clone-R                                   | CCCGAATGATTTTCGCTTACCC |
| SOCS1-3UTR-149nt-clone-F                             | TCGAGCTGCTGGAGCACTAC   |
| SOCS1-3UTR-261nt-clone-R                             | CAGGTCCTGGCTCCAGATAC   |
| TNIP1-3UTR-167nt-clone-F                             | CTCAGCTGGATGAGAGGCTGAG |
| TNIP1-3UTR-774nt-clone-R                             | AGCCACCCTAATCTGGGCTTC  |
