# Supplementary material for: Oncogenic miR-210-3p promotes prostate cancer cell EMT and bone metastasis via NF-κB signaling pathway
Source: PubMed Central journal article supplement (PMC5504657; doi:10.1186/s12943-017-0688-6), 2017-07-10
Supplement: 12943_2017_688_MOESM3_ESM.pdf [file 12943_2017_688_MOESM3_ESM.pdf]

**Table S3. The clinicopathological characteristics in 149 patients with prostate cancer**

| Parameters                               | Number of cases |
|------------------------------------------|-----------------|
| Age (years)                              |                 |
| $\leq 72$                                | 74              |
| $> 72$                                   | 75              |
| Median                                   | 73              |
| SD                                       | 11.5            |
| Differentiation                          |                 |
| Well/moderate                            | 69              |
| Poor                                     | 80              |
| Serum PSA at diagnosis, $\mu\text{g/mL}$ |                 |
| $< 90.2$                                 | 74              |
| $> 90.2$                                 | 75              |
| Median                                   | 90.2            |
| SD                                       | 384.2           |
| Mean                                     | 303.9           |
| Gleason grade                            |                 |
| $\leq 7$                                 | 78              |
| $> 7$                                    | 71              |
| Operation                                |                 |
| TURP                                     | 20              |
| Needle biopsy                            | 6               |
| TURP+PP                                  | 4               |
| TURP+BO                                  | 30              |
| BO                                       | 11              |
| miR-210-3p expression                    |                 |
| $< 5.87$                                 | 75              |
| $> 5.87$                                 | 74              |
| Median                                   | 5.87            |
| SD                                       | 4.73            |
| Mean                                     | 7.49            |
| BM-status                                |                 |
| BM-free                                  | 81              |

---

**Abbreviation: PSA, prostate-specific antigen; TURP, Trans Urethral Resection Prostate; PP, Prior Prostatectomy; BO, Bilateral Orchiectomies; SD, Standard deviation; IHC, Immunological Histological Chemistry; BM, Bone Metastasis.**
