# Supplementary material for: Oncogenic miR-210-3p promotes prostate cancer cell EMT and bone metastasis via NF-κB signaling pathway
Source: PubMed Central journal article supplement (PMC5504657; doi:10.1186/s12943-017-0688-6), 2017-07-10
Supplement: 12943_2017_688_MOESM5_ESM.pdf [file 12943_2017_688_MOESM5_ESM.pdf]

**Table S4. The relationship between miR-210-3p and clinicopathological characteristics in 149 patients with prostate cancer.**

| Parameters             | Number of cases | miR-210-3p expression |      | <i>P</i> values |
|------------------------|-----------------|-----------------------|------|-----------------|
|                        |                 | Low                   | High |                 |
| <b>Age (years)</b>     |                 |                       |      |                 |
| ≤72                    | 74              | 38                    | 36   | 0.805           |
| >72                    | 75              | 37                    | 38   |                 |
| <b>Differentiation</b> |                 |                       |      |                 |
| Well/moderate          | 69              | 34                    | 35   | 0.391           |
| Poor                   | 80              | 41                    | 39   |                 |
| <b>Serum PSA</b>       |                 |                       |      |                 |
| <90.2                  | 75              | 48                    | 27   | <0.001*         |
| >90.2                  | 74              | 27                    | 47   |                 |
| <b>Gleason grade</b>   |                 |                       |      |                 |
| ≤7                     | 78              | 53                    | 25   | <0.001*         |
| >7                     | 71              | 22                    | 49   |                 |
| <b>Operation</b>       |                 |                       |      |                 |
| TURP                   | 68              | 36                    | 32   | 0.800           |
| Needle biopsy          | 72              | 35                    | 37   |                 |
| TURP+PP                | 11              | 4                     | 7    |                 |
| TURP+BO                | 31              | 17                    | 14   |                 |
| BO                     | 16              | 7                     | 9    |                 |
| <b>BM-status</b>       |                 |                       |      |                 |
| nBM                    | 81              | 55                    | 26   | <0.001*         |
| BM                     | 68              | 20                    | 48   |                 |

**Abbreviation: PSA, prostate-specific antigen; TURP, Trans Urethral Resection Prostate; PP, Prior Prostatectomy; BO, Bilateral Orchiectomies; SD, Standard deviation; IHC, Immunological Histological Chemistry; BM, Bone Metastasis.**
