# Supplementary material for: Oncogenic miR-210-3p promotes prostate cancer cell EMT and bone metastasis via NF-κB signaling pathway
Source: PubMed Central journal article supplement (PMC5504657; doi:10.1186/s12943-017-0688-6), 2017-07-10

**Figure S6**

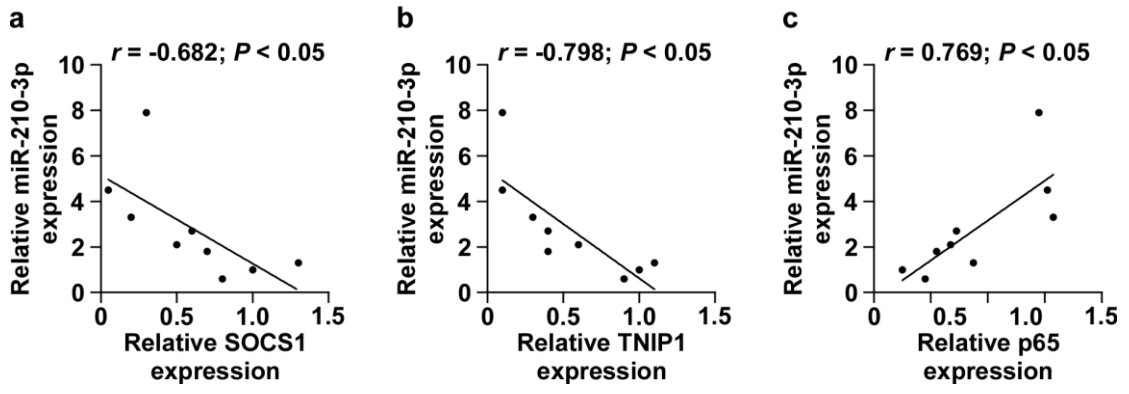

Supplement: 12943_2017_688_MOESM10_ESM.pdf [file 12943_2017_688_MOESM10_ESM.pdf]
