# Supplementary material for: Oncogenic miR-210-3p promotes prostate cancer cell EMT and bone metastasis via NF-κB signaling pathway
Source: Springer Nature journal article supplement (doi:10.1186/s12943-017-0688-6), 2017-07-10
Supplement: MOESM2 [file 13292382]

**Table S2. A list of primers used in the reactions for real-time RT-PCR.**

| <b>Real-time PCR primer:</b> |                        |
|------------------------------|------------------------|
| TNIP1-up                     | CAGCAGCAGGCTAGTGTGAC   |
| TNIP1-dn                     | CTGCTTGTTCACTTCCAGCA   |
| SOCS1-up                     | CACATGGTTCCAGGCAAGTA   |
| SOCS1-dn                     | CTACCTGAGCTCCTTCCCCT   |
| PIAS4-up                     | AAGCTTCTCGTTGTTCTGTGG  |
| PIAS4-dn                     | CAAGACCCTCAAGCCAGAAG   |
| PDLIM7-up                    | CACGTGCCAGGTCATCTTC    |
| PDLIM7-dn                    | ATGCTATGACGTGCGCTATG   |
| TWIST1-up                    | TCCATTTTCTCCTTCTCTGGAA |
| TWIST1-dn                    | GTCCGCGTCCCCTAGC       |
| MMP13-up                     | AACATCCAAAAACGCCAGAC   |
| MMP13-dn                     | GGAAGTTCTGGCCAAAATGA   |
| IL11-up                      | TGAAGACTCGGCTGTGACC    |
| IL11-dn                      | CCTCACGGAAGGACTGTCTC   |
| GAPDH-up                     | ATTCCACCCATGGCAAATTC   |
| GAPDH-dn                     | TGGGATTTCCATTGATGACAAG |
