# Supplementary material for: Oncogenic miR-210-3p promotes prostate cancer cell EMT and bone metastasis via NF-κB signaling pathway
Source: Springer Nature journal article supplement (doi:10.1186/s12943-017-0688-6), 2017-07-10

**Figure S4**

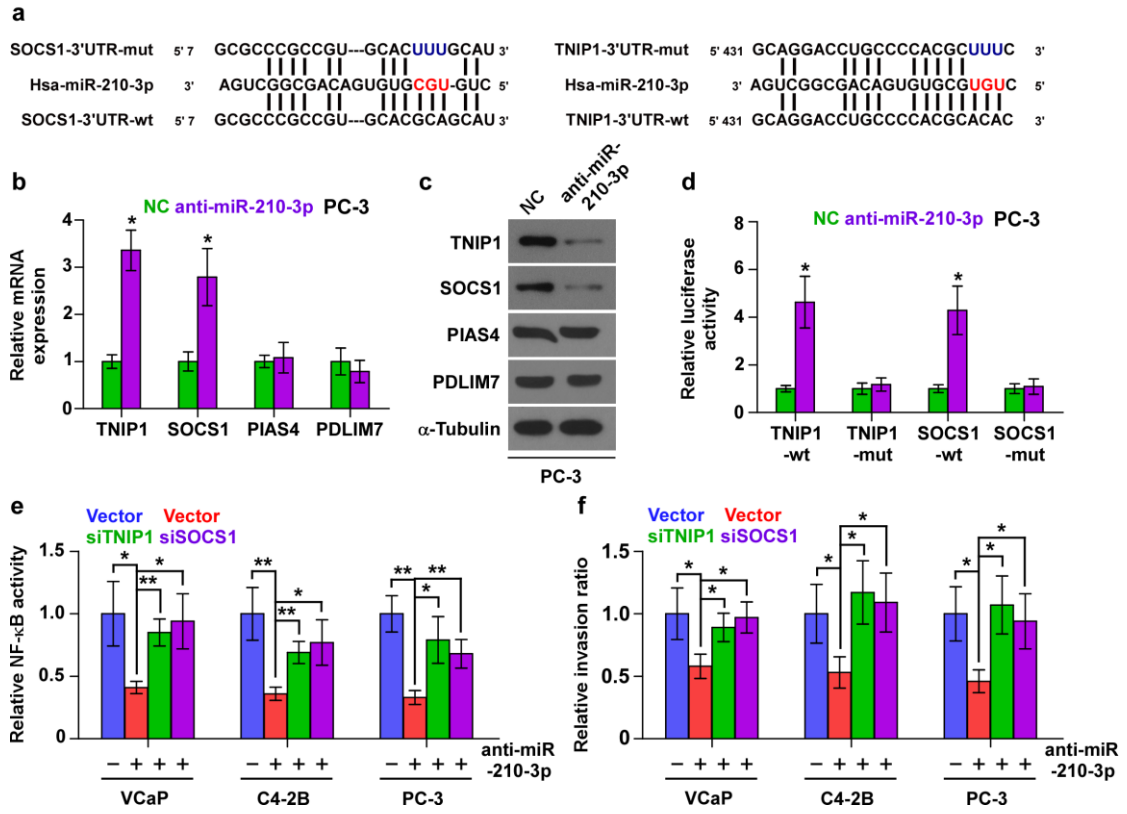

Supplement: MOESM8 [file 13292382]
